# Supplementary material
Source: HighWire-hosted journal article supplement (https://n.neurology.org/content/suppl/2017/03/09/WNL.0b013e3181a6b312)
Supplement: NEUROLOGY2016000009.pdf [file NEUROLOGY2016000009.pdf]

# Actualización del Parámetro de práctica: Cuestiones sobre el manejo de mujeres con epilepsia- Enfoque en el embarazo (revisión basada en evidencia): Desenlace perinatal y Teratogénesis

Reporte de los Subcomités de Estándares de Calidad y de Evaluación Terapéutica y Tecnológica de la Academia Americana de Neurología y la Sociedad Americana de Epilepsia

C.L. Harden, MD  
K.J. Meador, MD  
P.B. Pennell, MD  
W.A. Hauser, MD  
G.S. Gronseth, MD  
J.A. French, MD  
S. Wiebe, MD  
D. Thurman, MD, MPH  
B.S. Koppel, MD  
P.W. Kaplan, MB, FRCP  
J.N. Robinson, MD  
J. Hopp, MD  
T.Y. Ting, MD  
B. Gidal, PharmD  
C.A. Hovinga, PharmD  
A.N. Wilner, MD  
B. Vazquez, MD  
L. Holmes, MD  
A. Krumholz, MD  
R. Finnell, PhD  
D. Hirtz, MD  
C. Le Guen

## RESUMEN

**Objetivo:** Revalorar la evidencia sobre cuestiones del manejo relacionadas a la atención de mujeres con epilepsia (MCE) durante el embarazo.

**Métodos:** Revisión sistemática de artículos relevantes publicados entre enero de 1985 y junio de 2007.

**Resultados:** Es muy probable que la exposición intrauterina al valproato (VPA) durante el primer trimestre del embarazo represente un mayor riesgo de malformaciones congénitas importantes (MCI) comparadas con la carbamazepina y posiblemente también comparado con fenitoína o lamotrigina. Comparando con MCE sin tratamiento, es probable que el VPA como parte de politerapia, y es posible que la monoterapia con VPA contribuyan al desarrollo de MCI. Es probable que la politerapia con fármacos antiepilépticos (FAE) comparada con regímenes de monoterapia contribuya al desarrollo de MCI y a la reducción de capacidades cognitivas. Como monoterapia, la exposición intrauterina a VPA probablemente provoca reducción de capacidades cognitivas. Además, la exposición a la monoterapia con fenitoína o fenobarbital posiblemente provoca reducción de capacidades cognitivas. Los neonatos de MCE que tomaron FAE probablemente tienen un mayor riesgo de ser pequeños para la edad gestacional y posiblemente tienen un mayor riesgo de un índice de Apgar de 1 minuto < 7.

**Recomendaciones:** Se debe considerar en lo posible evitar el uso de VPA y la politerapia con FAE durante el primer trimestre del embarazo, para reducir el riesgo de malformaciones congénitas importantes (Nivel B). Se debe considerar en lo posible, evitar el uso de VPA y la politerapia con FAE a lo largo del embarazo para prevenir resultados de reducción cognoscitiva (Nivel B). Se debe considerar evitar, en lo posible, la fenitoína y el fenobarbital para prevenir desenlaces de reducción cognoscitiva (Nivel C). La estratificación de riesgo del embarazo debe reflejar que los hijos de mujeres con epilepsia que tomaron FAE probablemente tienen un mayor riesgo de ser pequeños para la edad gestacional (Nivel B) y posiblemente un mayor riesgo de tener un Apgar de 1 minuto < 7 (Nivel C). *Neurology*® 2009;73:133-141

## GLOSARIO

**AAN** = Academia de Neurología; **FAE** = fármacos antiepilépticos; **CBZ** = carbamazepina; **CI** = intervalo de confianza; **LTG** = lamotrigina; **MCM** = malformaciones congénitas mayores; **OR** = odds ratio (razón de momios); **PB** = fenobarbital; **PHT** = fenitoína; **RR** = riesgo relativo; **SGA** = pequeño para edad gestacional; **VPA** = valproato; **MCE** = mujeres con epilepsia.

Los cálculos recientes de la población de Estados Unidos<sup>1</sup> y la prevalencia de epilepsia<sup>2</sup> indican que aproximadamente medio millón de mujeres con epilepsia (MCE) están en edad reproductiva. También se calcula que de tres a cinco de cada mil nacimientos serán de MCE.<sup>3</sup> La epilepsia se define como la presencia recurrente, no provocada de crisis epilépticas y el tratamiento suele ser

Supplemental data  
at [www.neurology.org](http://www.neurology.org)

Disclosure: Author disclosures are provided at the end of the article.

e-Pub ahead of print on April 27, 2009, at [www.neurology.org](http://www.neurology.org).

Published simultaneously in *Epilepsia*.

Authors' affiliations are listed at the end of the article.

The Mission Statements of the Quality Standards Subcommittee (QSS) and Therapeutics and Technology Assessment (TTA) Subcommittee, Conflict of Interest Statement, QSS members, TTA members, AAN classification of evidence, Classification of recommendations (appendices e-1 through e-5), as well as references e1 through e5 and tables e-1 through e-7, are available on the *Neurology*® Web site at [www.neurology.org](http://www.neurology.org).

Approved by the Quality Standards Subcommittee April 15, 2008; by the Therapeutics and Technology Assessment Subcommittee December 17, 2007; by the Practice Committee January 25, 2009; and by the AAN Board of Directors March 25, 2009.

Supported by The Milken Family Foundation.

Address correspondence and reprint requests to the American Academy of Neurology, 1080 Montreal Avenue, St. Paul, MN 55116 [guidelines@aan.com](mailto:guidelines@aan.com)

The American Academy of Neurology Institute and its publisher thank the Mexican Academy of Neurology for translating this guideline.

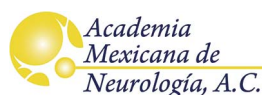

un régimen diario y a largo plazo de fármacos antiepilépticos. La mayoría de la gente con epilepsia tiene crisis epilépticas bien controladas se encuentran por lo demás sanos, y por tanto controladas, se espera que participen plenamente en las experiencias de la vida, incluyendo la maternidad. Este parámetro resume la evidencia sobre tres cuestiones importantes en relación al manejo clínico de MCE que están embarazadas o planean embarzarse.

1. ¿Cuál es el riesgo de malformaciones congénitas importantes (MCI) asociadas a la exposición intrauterina a FAE de neonatos nacidos a MCE?
2. ¿Cuál es el riesgo de desenlaces cognitivos adversos a largo plazo en niños nacidos de MCE?
3. ¿Cuál es el riesgo de muerte, bajo peso al nacer y bajos puntajes Apgar en neonatos de MCE?

**DESCRIPCIÓN DEL PROCESO ANALÍTICO** El proceso de formación del panel, la estrategia de búsqueda bibliográfica y el proceso de análisis de la literatura está descrito en el artículo anexo.<sup>4</sup>

**ANÁLISIS DE LA EVIDENCIA Malformaciones congénitas importantes.** Se identificaron cincuenta y dos artículos relevantes en la revisión bibliográfica. Los artículos se clasificaron de acuerdo al riesgo de sesgo según los criterios para la clasificación de evidencia de causalidad de la Academia Americana de Neurología (AAN) (Anexo e-4A en el sitio web de *Neurology*<sup>®</sup> en [www.neurology.org](http://www.neurology.org)). Los estudios clasificados Clase III o más alta que contribuyeron a las conclusiones, se resumieron en las tablas e-1 a e-5. Las MCI se definieron como anomalías estructurales con importancia quirúrgica, médica o cosmética.<sup>5</sup> Las malformaciones menores, como dismorfia facial, no se consideraron en el análisis estadístico. Para el propósito de este parámetro, la presencia de las MCI fue considerado como un desenlace objetivo. Para obtener la calificación de Clase I o II, el estudio debió corregir para factores de confusión por la edad materna y el nivel socioeconómico. La contribución de la epilepsia materna al riesgo de MCI no se considera específicamente en este documento, ya que la evidencia no es clara y el riesgo, en su caso, parece mínimo.<sup>6</sup> Sin embargo, no se puede afirmar que el riesgo impartido por la epilepsia materna sea nulo. Por lo tanto, abordamos la cuestión en relación al riesgo de MCI debido a los FAE tomados durante el primer trimestre incluyendo sólo estudios donde las MCE que no tomaran FAE sirvieran como base de comparación. Reconocemos que la gravedad de la epilepsia materna en términos de tipo y frecuencia de crisis no se puede igualar completamente con la de los grupos de comparación y puede contribuir a la diferencia en los resultados entre los

dos grupos. Las mujeres sin epilepsia que tomaron FAE por otra razón no fueron incluidas. Para las siguientes cuestiones, la evaluación se enfocó en los riesgos de los FAE comparados entre sí, o en los resultados específicos a un FAE individual tales como una relación dosis-malformación. Por consiguiente, los tres estudios utilizados para responder a estas cuestiones<sup>7-9</sup> incluyeron a los hijos de mujeres que tomaron FAE por varias indicaciones.

**¿Incrementa el riesgo de MCI las FAE tomadas durante el primer trimestre del embarazo en los hijos de MCE comparadas con los hijos de MCE que no toman FAE? FAE en general.** Un estudio Clase I<sup>10</sup> no mostró incremento en el riesgo de MCI en los hijos de MCE tomando FAE, en comparación con los hijos de las MCE que no toman FAE (riesgo relativo [RR] 1.19, intervalo de confianza [IC] 0.59–2.40). Sin embargo, el estudio no fue lo suficientemente sensible para excluir un riesgo considerablemente mayor. Dos estudios Clase II (razón de momios [OR] 3.92, IC 1.29–11.90<sup>5</sup> y OR 1.70, IC 1.07–2.68)<sup>11</sup> encontraron un mayor riesgo de MCI con la exposición materna a FAE en comparación con las MCE no tratadas.

**Valproato.** Un estudio Clase II<sup>11</sup> demostró un mayor riesgo de MCI en los hijos de MCE utilizando valproato (VPA) en monoterapia (OR 4.18, IC 2.31–7.57) o politerapia (OR 3.54, IC 1.42–8.11). Un estudio Clase I<sup>10</sup> también mostró que el riesgo de MCI con politerapia que incluye VPA se incrementó comparado con las MCE que no recibieron tratamiento (RR 2.52, IC 1.17–5.44).

**Carbamazepina.** Un estudio Clase I<sup>10</sup> no encontró incremento en el riesgo de MCI en hijos de MCE que tomaban carbamazepina (CBZ) (RR 0.63, IC 0.28–1.41).

**Lamotrigina.** Un estudio Clase I<sup>10</sup> observó que no se incrementa el riesgo de MCI en hijos de MCE que toman lamotrigina (LTG) (RR 0.92, IC 0.41–2.05) pero no fue suficientemente sensible para excluir un riesgo considerablemente mayor.

El riesgo absoluto de MCI en el estudio Clase I más grande<sup>10</sup> con al menos 80 resultados por FAE es el siguiente: CBZ (n = 900) 2.2% (IC 1.4–3.4), VPA (n = 715) 6.2% (IC 4.6–8.8), LTG (n = 647) 3.2% (IC 2.1–4.9), fenitoína (PHT) (n = 82) 3.7% (IC 1.3–10.2).

#### Conclusiones.

- Los FAE tomados durante el primer trimestre probablemente aumentan el riesgo de MCI en la descendencia de MCE (dos estudios Clase II adecuadamente sensibles), pero no se puede determinar si el aumento en el riesgo es debido a todos los FAE o por sólo uno o varios FAE.

- El VPA en monoterapia durante el primer trimestre posiblemente aumente el riesgo de MCI en la descendencia de MCE (un estudio Clase II).
- El VPA utilizado en politerapia probablemente aumente el riesgo de MCI en la descendencia de MCE (un estudio Clase I).
- La CBZ probablemente no aumente sustancialmente el riesgo de MCI en la descendencia de MCE (un estudio Clase I).
- No hay suficiente evidencia para determinar si LTG (un estudio Clase I inadecuadamente sensible) u otros FAE específicos (no hay evidencia Clase III o mejor) aumentan el riesgo de MCI en la descendencia de MCE.

#### *Recomendaciones.*

- A pesar de que existe evidencia de que los FAE tomados durante el primer trimestre probablemente aumenten el riesgo de MCI en los hijos de MCE, no se puede determinar si el aumento del riesgo es debido a todos los FAE o sólo uno o varios FAE. Por consiguiente, no se hace ninguna recomendación sobre esta conclusión.
- De ser posible, se debe considerar evitar el uso de VPA como parte de la politerapia durante el primer trimestre del embarazo para disminuir el riesgo de MCI (Nivel B).
- De ser posible, se debe considerar evitar el uso de VPA como monoterapia durante el primer trimestre del embarazo para disminuir el riesgo de MCI (Nivel C).

**¿Está asociada la exposición a un FAE específico durante el primer trimestre del embarazo con el aumento en el riesgo de MCI comparado con la exposición a otros FAE?** Dos estudios Clase I (OR 2.97, IC 1.65–5.35<sup>10</sup> y OR 2.51, IC 1.43–4.86<sup>7</sup>) revelaron que la monoterapia con VPA está asociado a un riesgo mayor de MCI que la monoterapia con CBZ. Un estudio Clase I<sup>10</sup> y un estudio Clase II<sup>11</sup> mostraron que el VPA como parte de una politerapia está asociado a un mayor riesgo que la politerapia sin VPA (OR 2.49, IC 1.31–4.70<sup>10</sup> y OR 1.97, IC 0.58–6.66<sup>11</sup>). Un estudio Clase II<sup>12</sup> mostró que el VPA está asociado a un riesgo mayor que la PHT (OR 9.06, IC 1.13–72.14). Realizamos comparaciones de tres de los cuatro estudios de Clase III, a partir de los datos primarios de los artículos.<sup>13–15</sup> Todas las comparaciones significativas entre los FAE se presentan aquí. En dos estudios Clase III,<sup>13,14</sup> el VPA está asociado con el aumento del riesgo cuando se compara individualmente con CBZ (RR 4.34, IC 1.79–10.53<sup>13</sup> y RR 3.83, IC 1.41–10.39<sup>14</sup>) y con LTG (RR 5.58, IC 2.06–15.09<sup>13</sup> y RR 17.04, IC 2.27–128.05<sup>14</sup>). El tercer estudio Clase III<sup>15</sup> mostró que el VPA está asociado a un mayor riesgo que el Fenobarbital (PB) (RR 5.66, IC 1.19–26.88). Los cuatro estudios de Clase III mostraron que el VPA

se asocia con un riesgo mayor que todas las otras monoterapias combinadas. Comparamos al VPA con CBZ, LTG y PHT en dos estudios y en ambos encontramos un incremento en el riesgo (RR 5.6, IC 2.42–12.92,<sup>13</sup> y RR 4.59, IC 2.07–10.18<sup>14</sup>). En el tercer estudio Clase III,<sup>15</sup> comparamos VPA con PB, CBZ, PHT y primidona y encontramos un aumento en el riesgo (RR 3.25, IC 1.27–8.33). En el cuarto estudio Clase III, encontramos un aumento en el riesgo de VPA comparado con tres FAE no mencionados (OR 4.0, IC 2.1–7.4).<sup>16</sup>

#### *Conclusiones.*

- Es altamente probable que tomar VPA en monoterapia durante el primer trimestre del embarazo contribuya al desarrollo de MCI en la descendencia de MCE en comparación con tomar CBZ (dos estudios Clase I).
- El VPA como parte de una politerapia en el primer trimestre del embarazo probablemente contribuye al desarrollo de MCI en la descendencia de MCE comparado con la politerapia que no incluye VPA (un estudio Clase I).
- Tomar VPA durante el primer trimestre del embarazo posiblemente contribuye al desarrollo de MCI en la descendencia de MCE en comparación con tomar PHT (un estudio Clase II).
- Tomar VPA durante el primer trimestre del embarazo posiblemente contribuye al desarrollo de MCI en la descendencia de MCE en comparación con tomar LTG (dos estudios Clase III).

#### *Recomendaciones.*

- Para reducir el riesgo de MCI, se debe evitar, en lo posible, el uso del VPA durante el primer trimestre del embarazo, comparado con el uso de CBZ (Nivel A).
- Para reducir el riesgo de MCI, se debe considerar evitar, en lo posible, el uso de politerapia con VPA durante el primer trimestre del embarazo, en comparación con la politerapia sin VPA (Nivel B).
- Para reducir el riesgo de MCI, se debe considerar evitar, en lo posible, el uso del VPA durante el primer trimestre del embarazo, comparado con el uso de PHT o LTG (Nivel C).

**¿Es mayor el riesgo de MCI por FAE en politerapia comparado con FAE en monoterapia tomados durante el primer trimestre del embarazo?** Un estudio Clase I<sup>10</sup> mostró un incremento moderado del riesgo de MCI de politerapia vs monoterapia (RR 1.62, IC 1.14–2.31). Tres estudios Clase II (OR 1.76, IC 0.94–3.31<sup>11</sup>; OR 2.00, IC 0.80–3.74<sup>5</sup>; y OR 1.46, IC 0.83–2.56<sup>12</sup>) no demostraron aumento en el riesgo con politerapia. Sin embargo, estos estudios no fueron suficientemente sensibles para excluir un riesgo sustancialmente incrementado.

**Conclusión.** La politerapia probablemente contribuya al desarrollo de MCI en la descendencia de MCE en comparación con la monoterapia (un estudio Clase I).

**Recomendación.** Para reducir el riesgo de MCI se debe considerar evitar, en lo posible, el uso de FAE en politerapia durante el primer trimestre del embarazo (Nivel B).

**¿Existe una relación entre la dosis de los FAE y el riesgo de MCI en la descendencia de MCE?** Todos los estudios evaluaron la dosis de FAE en el primer trimestre y las MCI. En un estudio Clase I,<sup>10</sup> se reportó la relación entre la dosis del FAE y el riesgo de MCI para LTG pero no para VPA. Utilizando el método Cochran - Armitage,<sup>17</sup> encontramos una relación significativa de la dosis con VPA (pruebas exactas de  $p$  de un lado = 0.02,  $p$  de dos lados = 0.04) y con LTG (pruebas exactas de  $p$  de un lado = 0.01,  $p$  de dos lados = 0.02), pero no con CBZ (pruebas exactas de  $p$  de un lado = 0.19,  $p$  de dos lados = 0.31). Dos estudios Clase II<sup>11,12</sup> y seis Clase III<sup>13-15,18-20</sup> también encontraron una relación entre la dosis de VPA y las MCI. La dosis de VPA la cual las MCI son significativamente más probables que ocurran no fue consistente, pero fue de aproximadamente 1,000 mg al día en cinco estudios.<sup>12,13,18-20</sup>

**Conclusión.** Existe una probable relación entre la dosis de VPA, LTG y el riesgo de desarrollar MCI en la descendencia de MCE (un estudio Clase I).

**Recomendación.** De ser posible, se debe considerar limitar la dosis de VPA o LTG durante el primer trimestre para disminuir el riesgo de MCI (Nivel B).

**¿Existen MCI específicas asociadas con FAE específicos?** Un estudio Clase I mostró aumento en el riesgo de defectos del tubo neural y fisuras faciales con VPA (RR 5.32, IC 1.38-20.50 para defectos del tubo neural y RR 4.18, IC 1.55-11.25 para fisuras faciales). Un estudio Clase II<sup>8</sup> mostró un incremento en el riesgo de paladar hendido con PHT y paladar posterior hendido con CBZ. Otro estudio Clase II<sup>12</sup> mostró incremento en el riesgo de defectos del tubo neural e hipospadias debido al VPA. Dos estudios Clase III mostraron incremento en el riesgo de espina bífida con VPA,<sup>9,21</sup> y uno mostró aumento en el riesgo de hipospadias.<sup>9</sup> Dos estudios Clase III<sup>9,15</sup> mostraron un mayor riesgo de malformaciones cardíacas asociada al PB.

#### **Conclusiones.**

- La exposición al PHT in utero posiblemente contribuye al riesgo de presentar paladar hendido (un estudio Clase II).
- La exposición a la CBZ in utero posiblemente contribuye al riesgo de presentar paladar posterior hendido (un estudio Clase II).

- La exposición al VPA in utero probablemente contribuye al riesgo de presentar defectos del tubo neural y fisuras faciales (un estudio Clase I) y posiblemente contribuya a presentar hipospadias (un estudio Clase II).
- La exposición al PB in utero posiblemente contribuye al riesgo de presentar malformaciones cardíacas (dos estudios Clase III).

#### **Recomendaciones.**

- Se debe considerar evitar, en la medida de lo posible, el uso de VPA para reducir el riesgo de defectos del tubo neural y fisuras faciales (Nivel B) y se puede considerar evitar el uso de VPA para reducir el riesgo de hipospadias (Nivel C).
- Se puede considerar evitar, en la medida de lo posible, el uso de PHT, CBZ y PB para reducir el riesgo de MCI específicas: paladar hendido por el uso de PHT, paladar posterior hendido por el uso de CBZ y malformaciones cardíacas por el uso de PB (Nivel C).

**Teratogénesis cognoscitiva.** Se identificaron trece artículos relevantes en la búsqueda bibliográfica (tabla e-6). Se calificaron por el riesgo de sesgo utilizando el esquema de clasificación de evidencia de causalidad de la AAN (anexo e-4A). La medida de desenlace fue una evaluación del CI (coeficiente intelectual) del niño a la edad de 2 años o más. Ya que el CI materno tiene una influencia importante en el CI del niño, los estudios fueron descalificados si no tenían un control para el CI materno. A diferencia del análisis para el riesgo de MCI, el riesgo cognitivo relacionado con la exposición a FAE no se limitó al primer trimestre, ya que el riesgo debido a la exposición puede estar presente a lo largo de todo el embarazo, como se sugiere en la bibliografía.<sup>23</sup>

**¿Empeora el desenlace cognoscitivo en niños de las MCE que no han sido expuestos a FAE in utero?** Dos estudios Clase II<sup>24,25</sup> observaron que la cognición no se reduce en niños de MCE que no fueron expuestas a FAE. Uno es un estudio observacional ciego<sup>24</sup> que comparó el coeficiente intelectual de 64 niños de MCE que no tomaron FAE con 121 controles. No se encontraron diferencias importantes en el CI. El otro estudio<sup>25</sup> no mostró diferencias en el CI de 57 niños de MCE no tratadas y 57 niños control de la misma edad, raza y estrato socioeconómico.

**Conclusión.** La cognición probablemente no empeora en niños de MCE que no han sido expuestas a FAE in utero (dos estudios Clase II).

**Recomendaciones.** La asesoría de MCE que están contemplando la maternidad, debe reflejar que probablemente no hay mayor riesgo de reducción de la cognición en la descendencia de MCE que no toman FAE (Nivel B).



**¿Se reduce la cognición en niño de las MCE expuestos a FAE en el útero? Los FAE en general.** Dos estudios Clase II<sup>26,27</sup> y un estudio Clase III<sup>28</sup> mostraron reducción de la cognición en niños de MCE que toman FAE. Un estudio Clase II<sup>29</sup> y un estudio Clase III<sup>30</sup> no mostraron reducción. Las mediciones de los desenlaces en los estudios incluyeron pruebas de CI, prueba de coeficiente de desarrollo, o una evaluación de los hitos del desarrollo. Las diferencias entre los estudios probablemente son debidas a diferencias en el diseño y al control inadecuado de los factores de confusión.

**Carbamazepina.** Dos estudios Clase II<sup>24,31</sup> y tres estudios Clase III<sup>30,32,33</sup> mostraron que la CBZ no incrementa el riesgo de tener desenlaces cognoscitivos deficientes comparado con controles no expuestos a la CBZ.

**Valproato.** Dos estudios Clase II<sup>24,31</sup> mostraron que el VPA posee un riesgo mayor de desenlaces cognoscitivos deficientes comparados con controles no expuestos.

**Fenitoína.** Un estudio Clase II<sup>34</sup> y dos estudios Clase III<sup>30,33</sup> mostraron que la fenitoína posee un mayor riesgo de desenlaces cognoscitivos deficientes en comparación con controles no expuestos a la fenitoína.

**Fenobarbital.** Dos cohortes Clase III (analizadas por separados en un solo reporte) de hombres adultos que fueron expuestos in utero a PB encontraron reducciones en las capacidades cognoscitivas en comparación con la población normal.<sup>23</sup>

#### **Conclusiones.**

- No hay evidencia suficiente para determinar si los niños de las MCE en tratamiento con FAE en general tienen un mayor riesgo de reducción cognoscitiva (estudios Clase III conflictivos).
- La CBZ probablemente no incrementa los desenlaces cognoscitivos deficientes comparados con los controles no expuestos a la CBZ (dos estudios Clase II).
- El VPA está probablemente asociado con desenlaces cognoscitivos deficientes comparados con controles no expuestos al VPA (dos estudios Clase II).
- La PHT está posiblemente asociada con desenlaces cognoscitivos deficientes comparados con controles no expuestos a la PHT (un estudio Clase II y dos estudios Clase III).
- El PB está posiblemente asociada con resultados cognoscitivos deficientes en los niños varones de las MCE comparados con controles no expuestos al PB (dos estudios Clase III).

#### **Recomendaciones.**

- La exposición a la CBZ probablemente no produce discapacidad cognoscitiva en los hijos de MCE (Nivel B).

- De ser posible, se debe evitar el VPA durante el embarazo en mujeres con epilepsia para reducir el riesgo de desenlaces cognoscitivos deficientes (Nivel B).
- De ser posible, se puede considerar evitar el uso de PHT durante el embarazo en mujeres con epilepsia para reducir el riesgo de desenlaces cognoscitivos deficientes (Nivel C).
- De ser posible, se puede considerar evitar el uso de PB durante el embarazo en mujeres con epilepsia para reducir el riesgo de desenlaces cognoscitivos deficientes (Nivel C).

**¿Posee la exposición a una politerapia con FAE un riesgo mayor de desenlaces cognoscitivos deficientes comparada con la monoterapia?** Tres estudios Clase II<sup>24,26,35</sup> mostraron que los desenlaces cognoscitivos empeoran en niños expuestos a politerapia con FAE en comparación con la monoterapia. La evaluación de los resultados incluyó CI, CI verbal y la escala de madurez mental de la universidad Columbia.

**Conclusión.** Los desenlaces cognoscitivos probablemente empeoran en niños expuestos in utero a politerapia con FAE en comparación con monoterapia (tres estudios Clase II).

**Recomendación.** Se debe considerar la monoterapia en lugar de la politerapia en la medida de lo posible, para las MCE que toman FAE durante el embarazo para reducir el riesgo de desenlaces cognoscitivos deficientes (Nivel B).

**¿Está asociada la exposición a FAE específicos con desenlaces cognoscitivos deficientes en comparación con otros FAE?** **Valproato.** Dos estudios Clase II<sup>24,31</sup> demostraron resultados cognoscitivos reducidos en niños expuestos a VPA durante el embarazo en comparación con niños expuestos a CBZ. En uno de los estudios, el riesgo también fue mayor que para la PHT.<sup>31</sup>

**Otros FAE.** No existe evidencia de Clase III o mejor respecto a otros FAE.

#### **Conclusiones.**

- Los resultados cognoscitivos son probablemente peores en niños expuestos a VPA durante el embarazo en comparación con CBZ (dos estudios Clase II).
- Los resultados cognoscitivos son probablemente peores en niños expuestos a VPA durante el embarazo en comparación con PHT (un estudio Clase II).

#### **Recomendaciones.**

- Se debe considerar, en la medida de lo posible, evitar en MCE embarazadas el uso de VPA en comparación con el uso de CBZ para reducir el

riesgo de desenlaces cognoscitivos deficientes (Nivel B).

- Se debe considerar, en la medida de lo posible, evitar en MCE embarazadas el uso de VPA en comparación con el uso de PHT para reducir el riesgo de desenlaces cognoscitivos deficientes (Nivel C).

**Resultados perinatales adversos.** Se identificaron trece artículos relevantes mediante la búsqueda bibliográfica (tabla e-7). Los artículos se calificaron por el riesgo de sesgo utilizando el esquema de clasificación de evidencia pronóstica de la AAN (anexo e-4B).

Los resultados evaluados incluyeron 1) pequeños para edad gestacional (PEG), definido como peso al nacer por debajo del percentil 10 para la población de estudio una vez que se ajustaba para la edad gestacional y el sexo; 2) muerte perinatal y 3) puntaje Apgar.

**¿Existe un mayor riesgo de PEG en neonatos de MCE?** Dos estudios Clase II<sup>36,37</sup> mostraron un mayor riesgo de PEG en la descendencia de MCE que toman FAE. En un estudio Clase II, los embarazos de MCE que toman FAE tuvieron más del doble del riesgo de presentar PEG (n = 87) (OR 2.3, IC 1.3–4.0).<sup>36</sup> Los embarazos de MCE que no toman FAE no mostraron un riesgo significativamente incrementado de PEG (OR 1.6, IC 0.9–2.6). Sin embargo, el estudio no fue suficientemente sensible para excluir un riesgo sustancialmente incrementado. Otro estudio Clase II<sup>37</sup> observó el doble de riesgo de PEG en embarazos de MCE que tomaban FAE comparadas con controles (n = 127) (OR 2.16, IC 1.34–3.47, riesgo absoluto 17.3%). Los autores no encontraron incremento del riesgo de PEG en la descendencia de MCE que no tomaban FAE.

**Conclusión.** Los neonatos de MCE que toman FAE tienen probablemente mayor riesgo de PEG, aproximadamente del doble de la proporción esperada (dos estudios Clase II).

**Recomendación.** La estratificación de riesgo del embarazo debe reflejar que la descendencia de MCE que tomaron FAE durante el embarazo suelen tener un mayor riesgo de PEG. Además, el uso de FAE por MCE durante el embarazo debe ser considerado en el diagnóstico diferencial para PEG en sus hijos (Nivel B).

**¿Existe un mayor riesgo de muerte perinatal en neonatos nacidos de MCE?** Dos estudios Clase II<sup>38,39</sup> no observaron incremento en el riesgo de muerte perinatal (OR 0.57, IC 0.18–1.77).<sup>39</sup> Los estudios no fueron suficientemente sensibles para excluir un incremento moderado del riesgo.

**Conclusión.** Probablemente no existe un aumento sustancial del riesgo de muerte perinatal en neonatos nacidos de MCE (dos estudios Clase II).

**Recomendación.** La estratificación del riesgo del embarazo debe reflejar que los neonatos nacidos de MCE probablemente no tienen un riesgo considerablemente mayor de muerte perinatal (Nivel B).

**¿Son los puntajes Apgar más bajos en neonatos nacidos de MCE?** Un estudio Clase II<sup>37</sup> mostró un mayor riesgo de presentar calificación < 7 en el Apgar a 1 minuto en MCE que tomaron FAE (n = 127) (OR 2.29, IC 1.29–4.05, riesgo absoluto 11.0%). Además, este estudio mostró un aumento en la tasa de admisión neonatal a cuidados intensivos de recién nacidos de MCE que tomaron FAE. Estos dos resultados no aumentaron en los hijos de MCE que no tomaron FAE. Dos estudios Clase III<sup>40,e1</sup> mostraron puntajes Apgar bajos en comparación con los controles y tres estudios Clase III<sup>38,39,e2</sup> no lo hicieron. Ninguno de estos estudios Clase III reportaron el cálculo de los riesgos comparativos.

**Conclusión.** Los neonatos de MCE que tomaron FAE posiblemente tienen un mayor riesgo de presentar calificación < 7 en el Apgar a 1 minuto, de aproximadamente el doble de la tasa esperada (un estudio Clase II).

**Recomendación.** La estratificación de riesgo del embarazo debe reflejar que la descendencia de MCE que toman FAE durante el embarazo, posiblemente tienen un mayor riesgo de tener puntuaciones de < 7 en el Apgar a 1 minuto. Además, el uso de FAE durante el embarazo en MCE debe considerarse en el diagnóstico diferencial de una calificación < 7 en el Apgar a 1 minuto en su descendencia (Nivel C). Otros desenlaces perinatales tales como dificultad respiratoria, retraso del crecimiento intrauterino y la admisión a la unidad de cuidados intensivos neonatales, no tuvieron datos suficientes para establecer conclusiones.

**CONTEXTO CLÍNICO** Este parámetro se centra en los riesgos de los FAE relacionados al embarazo. Sin embargo, no evalúa el riesgo de no tomar FAE durante el embarazo. Los beneficios de la prevención de crisis epilépticas al tomar FAE son evidentes en la paciente no embarazada; estos mismos beneficios aplican a la paciente embarazada y se extienden a la protección del feto de las crisis epilépticas maternas. Aunque muchas de las recomendaciones en este parámetro sugieren minimizar la exposición a FAE durante el embarazo, para la mayoría de las MCE, la interrupción de los FAE no es una opción razonable ni segura. Aunque los riesgos de crisis epilépticas durante el embarazo no se han estudiado sistemáticamente, la interrupción de los FAE puede exponer a la madre y al feto a lesiones físicas por accidentes derivados de las crisis epilépticas parciales o generalizadas. Existen protocolos/flujoigramas para ayudar a decidir cuando suspender los FAE.<sup>e3</sup>

Con base en la evidencia revisada, parece razonable cambiar a las MCE en edad fértil a un régimen menos teratogénico cuando sea posible. El uso del VPA es un dilema especial. Mientras que el VPA es un FAE efectivo,<sup>e4</sup> surge como el FAE con más datos que muestran una asociación con riesgos tras la exposición in utero. Si se planea el cambio del VPA por otro FAE, parece prudente hacerlo mucho antes del embarazo para asegurarse de que el nuevo tratamiento evite adecuadamente las crisis convulsivas. El cambiar a otro FAE durante el embarazo supone el riesgo de alergia, otras reacciones adversas graves y exposición a politerapia. Una vez que una paciente está embarazada, el cambio del VPA cuando ya han pasado varias semanas de gestación no evitará el riesgo de MCI, dado que este fenómeno ocurre muy temprano en el embarazo. Esto también podría aplicarse a la teratogénesis cognitiva, ya que el momento de la exposición relacionada con este resultado adverso no se conoce.

Para muchos FAE, en particular los más recientes, hubo muy pocos pacientes en los estudios para obtener conclusiones, por lo que la teratogenicidad de estos fármacos es desconocida. El hallazgo de que algunas MCI son más frecuentes con la exposición a FAE específicos necesita ser observada dentro del contexto. Las MCI vistas con mayor frecuencia con el VPA, tales como defectos del tubo neural, también pueden estar presentes debido a la exposición a otros FAE, demostrando que esta no es una MCI específica a un FAE en particular. Al igual que otros agentes teratogénicos, los FAE como una categoría teratogénica producen un patrón de MCI que se traslapan entre los FAE individuales.

**RECOMENDACIONES PARA INVESTIGACIONES FUTURAS** Aunque este parámetro responde a algunas preguntas, plantea otras que hacen esta situación clínica aún más difícil. El parámetro muestra un aumento del riesgo de MCI con la exposición a VPA, pero hay una escasez de información específica sobre el riesgo absoluto de la mayoría de los FAE. Esto es particularmente cierto para los nuevos FAE, algunos de los cuales son alternativas razonables a VPA. Con el continuo reporte de datos a los registros de FAE en el embarazo, se espera que esta información pronto esté disponible.

Es necesario aclarar si existe una relación entre la dosis de FAE y las malformaciones en todos los FAE, así como la incorporación de los niveles séricos. Es necesario aclarar los desenlaces adversos neonatales y los desenlaces cognoscitivos a largo plazo de niños expuestos a FAE in utero, tanto para los FAE tradicionales como para los más recientes, así como los riesgos cognoscitivos a corto y largo plazo de la exposición a FAE en el período neonatal e infantil a través de la lactancia materna.

Asimismo, las investigaciones futuras deberían empezar a evaluar los sistemas metabólicos cuya modificación pudiera reducir el riesgo teratogénico, como la reductasa de glutatión, superóxido dismutasa, la epóxido hidrolasa, y otros mecanismos de depuración de toxinas. Además, las interacciones entre los FAE y sus objetivos moleculares como la histona deacetilasa y los receptores activados del proliferador de peroxisomas pueden desempeñar un papel en la teratogénesis. Un mayor entendimiento de estos factores podría con el tiempo permitir la evaluación individualizada de los riesgos teratogénicos para las MCE que toman FAE.<sup>e5</sup>

## AFILIACIÓN DE LOS AUTORES

De la Universidad de Miami (C.L.H.), Miami, FL; Universidad Emory (K.J.M., P.B.P.), Atlanta, GA; Universidad de Columbia (W.A.H.), Nueva York, NY; Centro Médico Universitario de Kansas (G.S.G.), Kansas City; Escuela Universitaria de Medicina de Nueva York (J.A.F.), Nueva York; Universidad de Calgary (S.W.), Alberta, Canadá; Centros para el Control y Prevención de Enfermedades (D.T.), Atlanta, GA; Colegio de Medicina de Nueva York (B.S.K.), Nueva York; Universidad Johns Hopkins (P.W.K.), Baltimore, MD; Facultad de Medicina de Harvard (J.N.R., L.H.), Boston, MA; Universidad de Maryland (J.H., T.Y.T., A.K.), Baltimore; Universidad de Wisconsin-Facultad de Farmacia de Madison (B.G.); Universidad de Tennessee Centro de ciencias de la salud (C.A.H.), Memphis; práctica privada (A.N.W.), Newport, RI; Universidad de Nueva York (B.V.), Nueva York; Centro Universitario de Ciencias de la Salud Texas A&M R.F.), Houston; NINDS (D.H.), Bethesda, MD; y Universidad de Pennsylvania (C.L.), Philadelphia.

## AGRADECIMIENTOS

Los autores agradecen a Julia Westerman, Julia Cumming y Laura Moses por su ayuda en la preparación de este manuscrito.

## DECLARACIÓN DE CONFLICTOS DE INTERÉS

Los autores reportan los siguientes conflictos de interés: la Dra. Harden ha servido en la junta de asesoramiento científico de Cyberonics, GlaxoSmithKline, UCB Pharma, Valeant, Farmacéutica SK y en la oficina de oradores de GlaxoSmithKline, Pfizer, UCB Pharma, y Abbott. Trabaja como editora de *Epilepsy Currents* y recibe regalías de Elsevier por publicaciones. La Dra. Harden ha recibido financiamiento de Forest, UCB Pharma, Ortho McNeil, y NIH/NINDS para investigaciones. La Dra. Harden da consulta a mujeres con epilepsia en su consultorio. El Dr. Meador sirve como un editor de la revista *Neurology*, *Journal of Clinical Neurophysiology*, *Cognitive and Behavioral Neurology*, *Epilepsy & Behavior*, *Epilepsy Currents*, y *Epilepsy.com*. Ha recibido financiamiento de NIH/NINDS, GlaxoSmithKline, Eisai, Marius, Myriad, Neupace, SAM Technology, y UCB Pharma para investigaciones. El Dr. Meador calcula que de 30% a 40% de su esfuerzo clínico lo emplea en EEG y el tratamiento clínico de pacientes con epilepsia. La Dra. Pennell ha servido en el Panel de expertos del Registro de Embarazos de Keppra patrocinado por UCB Pharma. Ha recibido financiamiento para viajar representando al Grupo Regional del Noreste sobre Epilepsia para hablar en su Simposio sobre Epilepsia en 2008, del Consejo de Investigación del Reino Unido como ponente en Taller internacional de expertos- Investigación sobre Epilepsia, de UCB Pharma para asistir a la reunión del Panel Ejecutivo del Registro de Embarazos, por la Sociedad Americana de Epilepsia para asistir a la reunión de la junta directiva, de la Fundación de Epilepsia para asistir a las reuniones de la junta directiva y de orientación; del Hospital Judío de Long Island para dar una plática en las Rondas de Neurología, de la Universidad Duke para dar una plática en las Rondas de Neurología; del Hospital de mujeres y de Birmingham para dar una plática en el Encuentro de Investigadores de la Epilepsia, de la Fundación Milken para asistir a la reunión del registro de embarazos y del hospital general de Massachusetts para dar una plática en el curso anual sobre teratogénesis. Ha recibido pago de honorarios del Journal Watch Neurology por un artículo, ha recibido un pago de la sociedad médica de Massachusetts, *NEJM*, para revisar el *Lancet Neurology*, por el Grupo Regional del Noreste sobre Epilepsia para dar una

plática en el Simposio de Epilepsia 2008, del Sistema de Salud Judío de la Costa Norte de Long Island, Universidad de Duke, la Universidad de Maryland y el Hospital General de Massachusetts para dar pláticas en el curso de postgrado en Teratógenos humanos, y de la AAN para dar pláticas y dirigir cursos anuales. La Dra. Pennell se ha desempeñado como editora colaboradora de *Epilepsy Currents* y es parte de la junta de editores de *Epilepsia*. La Dra. Pennell ha recibido apoyo para las investigaciones de UCB Pharma, Farmacéutica Marinus, NIH, NINDS, NIMH, CDC, y del Consejo de investigación de la Universidad Emory. El Dr. Hauser ha servido como asesor científico de Ovation y Valeant. Ha trabajado en la junta editorial de *Acta Neurologica Scandinavica*, *Neuroepidemiology*, y *Epilepsy Research*. Ha recibido honorarios del Simposio sobre Epilepsia para las investigaciones la Universidad de Cornell y actuó como asesor de Pfizer. El Dr. Hauser ha recibido apoyo para las investigaciones de AAMC/CDC, NIH/NINDS, FAA, la Clínica Mayo y el Instituto Neurológico Hotchkiss, y ha dado su testimonio de experto en su papel como consultor de la FAA. El Dr. Gronseth sirve como editor de *Neurology Now* y es miembro de la Oficina de Oradores de Boehringer-Ingelheim. Recibe una compensación por parte de la ANN por trabajos de consultoría. La Dra. French ha sido miembro de la junta de asesoramiento científico de UCB Pharma, Johnson y Johnson, Eisai, Novartis, Valeant, Icagen, Intranasal, Sepracor, y Marinus. Ha recibido financiamiento para viajes para presentar resultados o dar conferencias por parte de UCB Pharma, Kyowa, Eisai, Johnson y Johnson, Valeant, y GlaxoSmithKline. Se ha desempeñado como editor asociado de *Epilepsy Currents* y como editor de suplementos de *Epileptic Disorders*. La Dra. French es presidenta del Consorcio de Estudio de la epilepsia, que recibe dinero de varias compañías farmacéuticas (incluyendo GlaxoSmithKline, UCB Pharma, Johnson y Johnson, Cyberonics, Schwarz Pharma, Ortho McNeil, Eisai, Farmacéutica Jazz, Farmacéutica Ovation, Farmacéutica Endo, Farmacéutica Bial, Neurovista, Farmacéutica Valeant, Icagen, Supernus, Intranasal, Farmacéutica SK, Farmacéutica Taro, Neurotherapeutics, Sepracor, y Novartis) y ella consulta a nombre del consorcio. La Dra. French ha recibido financiamiento para investigaciones de Johnson y Johnson, Eisai, UCB Pharma, Farmacéutica SK, Valeant, Pfizer, NIH, y la Fundación para la investigación de la Epilepsia. Dr. Wiebe forma parte del consejo editorial de *Neurology*, *Epilepsia*, *Epilepsy & Behavior*, y *Canadian Journal of Neurological Sciences*.

Dr. Thurman es un empleado de la CDC. Dr. Koppel no reporta conflictos de interés. El Dr. Kaplan ha sido miembro de la oficina de conferencistas de UCB Pharma, GSK, y Ortho McNeil. Se desempeña como editor asociado de *Neurophysiologie Clinique*, *Journal of Clinical Neurophysiology*, y *Epilepsia*. Recibe regalías de Publicaciones Demos por los libros *Neurological Disease in Women*, *Epilepsy A to Z*, *Imitators of Epilepsy*, y *Nonconvulsive Status Epilepticus*. Ha recibido honorarios por ser conferencista del Colegio Médico de Carolina del Sur, la Universidad de Duke y el Colegio de Medicina de Virginia, ha recibido financiamiento para investigaciones del NIH, Schwarz, Ortho McNeil, y Pfizer, y ha actuado como consultor para Schering-Plough e Infinite Biological Technologies. Dr. Robinson no reporta conflictos de interés. La Dra. Hopp recibe honorarios de la revista médica electrónica UpToDate. Ha servido en la Mesa de Oradores de UCB Pharma y GlaxoSmithKline. La Dra. Hopp ha dado testimonio en un caso médico legal. El Dr. Ting sirvió en la junta de asesoramiento científico de UCB Pharma y ha recibido honorarios de la Fundación de América para la Epilepsia. Dr. Gidal ha servido en el comité científico asesor de GlaxoSmithKline, UCB Pharma, y Abbott Labs y se desempeñó como editor de *Epilepsy & Behavior*, *The Annals of Pharmacotherapy*, y *Pharmacist's Letter*. Dr. Gidal ha recibido financiamiento de UCB Pharma para investigación. Dr. Hovinga calcula que menos del 10% de su esfuerzo clínico se dedica a la consulta de farmacología. El Dr. Wilner sirvió en la junta de asesoramiento científico de GlaxoSmithKline y recibió fondos para sus viajes. Recibe regalías de Publicaciones Demo por *Epilepsy: 199 Answers* y *Epilepsy in Clinical Practice*. Recibe una compensación de la junta de directores de GlaxoSmithKline. La Dra. Vázquez ha sido miembro de la junta de asesoramiento científico de Eisai, UCB, GSK, y Ortho McNeil. Ella ha recibido honorarios de UCB, GSK, Ortho McNeil, y Eisai. La Dra. Vázquez ha trabajado en la oficina de oradores para Eisai, GSK, Ortho McNeil, UCB, y Novartis. El Dr. Holmes recibe apoyo para investigaciones de los laboratorios Abbott, Eisai, Novartis, Ortho McNeil, y Pfizer. Dr. Krumholz ha servido en el Panel de expertos del Departamento de Transporte sobre conductores comerciales y la epilepsia y ha sido miembro del

consejo editorial de *The Neurologist* y *Clinical EEG and Neuroscience*. Ha recibido honorarios de la Escuela de Medicina Robert Wood Johnson por asesoramiento clínico. El Dr. Finnell ha servido en la junta de asesoramiento científico del Estudio NEAD en la Universidad de Emory, Centro de Tecnología para las ciencias biológicas de la Universidad de Houston, el NIH, y el NIEHS Consejo Nacional de Ciencias de Salud Ambiental. Ha recibido fondos para viajar de la Fundación BBVA, NIEHS Consejo Nacional de Ciencias de Salud Ambiental, Comité Directivo de IKMC, la Junta Europea sobre la Epilepsia, NIH, y AES. El Dr. Finnell se ha desempeñado como editor de la revista *Birth Defects Research Part A* y tiene la patente sobre determinación de autoanticuerpos del receptor de folato. Ha recibido honorarios de McGraw Hill y el Instituto Neurológico de Montreal y ha recibido financiamiento para investigaciones de los Centros para el Control y Prevención de Enfermedades para el Estudio Nacional de Prevención de Defectos de Nacimiento y el Instituto de Investigación del Hospital Metodista. El Dr. Finnell ha dado testimonio de experto, ha preparado declaraciones juradas, y ha actuado como testigo en relación con los procedimientos legales relacionados con el tema de este manuscrito. Dr. Hirtz no reporta conflictos de interés. Señora Le Guen no reporta conflictos de interés.

## RENUNCIA DE RESPONSABILIDAD

La Academia Americana de Neurología proporciona esta declaración como un servicio educativo. Se basa en una evaluación de la información científica y clínica actual. No tiene como intención incluir todos los posibles métodos adecuados para la atención de un problema neurológico particular de entre todos los criterios legítimos para elegir un procedimiento específico. Tampoco tiene la intención de excluir alguna metodología alternativa razonable. La AAN reconoce que las decisiones de atención son la prerrogativa del paciente y del médico al cuidado del mismo, basada en todas las circunstancias involucradas. La sección del contexto clínico se pone a disposición a fin de poner los lineamiento(s) basado(s) en la evidencia en perspectiva con los hábitos de práctica actual y los desafíos. No se debe inferir ninguna recomendación de práctica formal. Los hallazgos y conclusiones en este reporte son las de los autores y no necesariamente representan la posición oficial del Centro de Control y Prevención de enfermedades.

Recibido el 2 de febrero de, 2009. Aceptado en su forma final el 23 de marzo de, 2009.

## REFERENCIAS

1. United States Department of Health and Human Services, Centers for Disease Control and Prevention, National Center for Health Statistics, Bridged-Race Population Estimates, United States. July 1st Resident Population by State, County, Age, Sex, Bridged-race, and Hispanic Origin on CDC WONDER On-line Database. Available at: <http://wonder.cdc.gov>. Accessed June 2008.
2. Hirtz D, Thurman DJ, Gwinn-Hardy K, et al. How common are the "common" neurologic disorders?. *Neurology* 2007;68:326-337.
3. Yerby MS. Quality of life, epilepsy advances, and the evolving role of anticonvulsants in women with epilepsy. *Neurology* 2000;55:S21-S31.
4. Harden CL, Hopp J, Ting TY, et al. Practice Parameter update: management issues for women with epilepsy—focus on pregnancy (an evidence-based review): obstetrical complications and change in seizure frequency: report of the Quality Standards Subcommittee and Therapeutics and Technology Assessment Subcommittee of the American Academy of Neurology and American Epilepsy Society. *Neurology* 2009;73:126-132.
5. Holmes LB, Harvey EA, Coull BA, et al. The teratogenicity of anticonvulsant drugs. *N Engl J Med* 2001;344:1132-1138.
6. Fried S, Kozler E, Nulman I, Einarson TR, Koren G. Malformation rates in children of women with untreated epilepsy. *Drug Safety* 2004;27:197-202.



7. Wide K, Winbladh B, Kallen B. Major malformations in infants exposed to antiepileptic drugs in utero, with emphasis on carbamazepine and valproic acid: a nation-wide, population-based register study. *Acta Paediatr* 2004;93:1774-1776.
8. Puho EH, Szunyogh M, Metneki J, Czeizel AE. Drug treatment during pregnancy and isolated orofacial clefts in Hungary. *Cleft Palate Craniofac J* 2007;4:194-202.
9. Arpino C, Brescianini S, Robert E, et al. Teratogenic effects of antiepileptic drugs: use of an international database on malformations and drug exposure (MADRE). *Epilepsia* 2000;41:1436-1443.
10. Morrow J, Russell A, Guthrie E, et al. Malformations risks of antiepileptic drugs in pregnancy: a prospective study from the UK Epilepsy and Pregnancy Register. *J Neurol Neurosurg Psychiatry* 2006;77:193-198.
11. Artama M, Auvinen A, Raudaskoski T, Isojarvi I, Isojarvi J. Antiepileptic drug use of women with epilepsy and congenital malformations in offspring. *Neurology* 2005;64:1874-1878.
12. Samrén EB, van Duijn CM, Christiaens GCML, Hofman A, Lindhout E. Antiepileptic drug regimens and major congenital abnormalities in the offspring. *Ann Neurol* 1999;46:739-746.
13. Vajda FJE, Hitchcock A, Graham J, et al. Foetal malformations and seizure control: 52 months data of the Australian Pregnancy Registry. *Eur J Neurol* 2006;13:645-654.
14. Meador KJ, Baker GA, Finnell RH, et al. In utero antiepileptic drug exposure: fetal death and malformations. *Neurology* 2006;67:407-412.
15. Canger R, Battino D, Canevini MP, et al. Malformations in offspring of women with epilepsy: a prospective study. *Epilepsia* 1999;40:1231-1236.
16. Wyszynski WF, Nambisan M, Surve T, Alsdorf RM, Smith CR, Holmes LB. Increased rate of major malformations in offspring exposed to valproate during pregnancy. *Neurology* 2005;64:961-965.
17. Agresti A. *Categorical Data Analysis (Wiley Series in Probability and Statistics)*. 2nd edition. Malden, MA: Wiley-Interscience; 2002.
18. Mawer G, Clayton-Smith J, Coyle H, Kini U. Outcome of pregnancy in women attending an outpatient epilepsy clinic: adverse features associated with higher doses of sodium valproate. *Seizure* 2002;11:512-518.
19. Omtzigt JGC, Los FJ, Grobbee DE, et al. The risk of spina bifida aperta after first-trimester exposure to valproate in a prenatal cohort. *Neurology* 1992;42(suppl 5):119-125.
20. Samrén EB, van Duijn CM, Koch S, et al. Maternal use of antiepileptic drugs and the risk of major congenital malformations: a joint European prospective study of human teratogenesis associated with maternal epilepsy. *Epilepsia* 1997;38:981-990.
21. Bertollini R, Mastroiaco P, Segni G. Maternal epilepsy and birth defects: a case-control study in the Italian Multicenter Registry of Birth Defects (IPIMC). *Eur J Epidemiol* 1985;1:67-72.
22. Sattler JM. *Assessment of Children Revised/updated*. 3rd ed. San Diego: Jerome M. Sattler; 1992.
23. Reinisch JM, Sanders SA, Mortensen EL, Rubin DB. In utero exposure to phenobarbital and intelligence deficits in adult men. *JAMA* 1995;274:1518-1525.
24. Gaily E, Kantola-Sorsa E, Hiilesmaa V, et al. Normal intelligence in children with prenatal exposure to carbamazepine. *Neurology* 2004;62:28-32.
25. Holmes LB, Rosenberger PB, Harvey EA, Khoshbin S, Ryan L. Intelligence and physical features of children of women with epilepsy. *Teratology* 2000;61:196-202.
26. Koch S, Titze K, Zimmermann RB, Schröder M, Lehmkuhl U, Rauh H. Long-term neuropsychological consequences of maternal epilepsy and anticonvulsant treatment during pregnancy for school-age children and adolescents. *Epilepsia* 1999;40:1237-1243.
27. Oyen N, Vollset SE, Eide MG, Bjerkedal T, Skjærven R. Maternal epilepsy and offspring's adult intelligence: a population-based study from Norway. *Epilepsia* 2007;48:1731-1738.
28. Hirano T, Fujioka K, Okada M, Iwasa H, Kaneko S. Physical and psychomotor development in the offspring born to mothers with epilepsy. *Epilepsia* 2004;45(suppl 8):53-57.
29. Gaily E, Kantola-Sorsa E, Granström ML. Specific cognitive dysfunction in children with epileptic mothers. *Dev Med Child Neurol* 1990;32:403-414.
30. Wide K, Henning E, Tomson T, Winbladh B. Psychomotor development in preschool children exposed to antiepileptic drugs in utero. *Acta Paediatr* 2002;91:409-414.
31. Adab N, Kini U, Vinten J, et al. The longer term outcome of children born to mothers with epilepsy. *J Neurol Neurosurg Psychiatry* 2004;75:1575-1583.
32. Eriksson K, Viinikainen K, Mönkkönen A, et al. Children exposed to valproate in utero: population based evaluation of risks and confounding factors for long-term neurocognitive development. *Epilepsy Res* 2005;65:189-200.
33. Scolnik D, Nulman I, Rovet J, et al. Neurodevelopment of children exposed in utero to phenytoin and carbamazepine monotherapy. *JAMA* 1994;271:767-770.
34. Vanoverloop D, Schnell RR, Harvey EA, Holmes LB. The effects of prenatal exposure to phenytoin and other anticonvulsants on intellectual function at 4 to 8 years of age. *Neurotoxicol Teratol* 1992;14:329-335.
35. Lösche G, Steinhausen HC, Koch S, Helge H. The psychological development of children of epileptic parents: II: the differential impact of intrauterine exposure to anticonvulsant drugs and further influential factors. *Acta Paediatr* 1994;83:961-966.
36. Hvas CL, Henriksen TB, Ostergaard JR, Dam M. Epilepsy and pregnancy: effect of antiepileptic drugs and lifestyle on birth weight. *Br J Obstet Gynaecol* 2000;107:896-902.
37. Viinikainen K, Heinonen S, Eriksson K, Kalviainen R. Community-based, prospective, controlled study of obstetric and neonatal outcome of 179 pregnancies in women with epilepsy. *Epilepsia* 2006;47:186-192.
38. Hiilesmaa VK, Bardy A, Teramo K. Obstetric outcome in women with epilepsy. *Am J Obstet Gynecol* 1985;152:499-504.
39. Richmond JR, Krishnamoorthy P, Andermann E, Benjamin A. Epilepsy and pregnancy: an obstetric perspective. *Am J Obstet Gynecol* 2004;190:371-379.
40. Laskowska M, Leszczyska-Gorzela B, Oleszczuk J. Pregnancy in women with epilepsy. *Gynecol Obstet Invest* 2001;51:99-102.
